# Supplementary material for: Characterization of the differences in the cyclopiazonic acid binding mode to mammalian and P. Falciparum Ca2+ pumps: A computational study
Source: PubMed Central journal article supplement (PMC4342768; doi:10.1002/prot.24734), 2015-01-10
Supplement: prot0083-0564-sd1.pdf [file prot0083-0564-sd1.pdf]

# Characterization of the differences in the cyclopiazonic acid binding mode to mammalian and *P. falciparum* Ca<sup>2+</sup> pumps: a computational study

Daniele Di Marino<sup>1</sup>, Ilda D'Annessa<sup>2</sup>, Andrea Coletta<sup>2</sup>, Allegra Via<sup>1\*</sup>, Anna Tramontano<sup>1,3</sup>

## Supporting Information

**A**

|                      |                                                                         |      |                            |                  |     |
|----------------------|-------------------------------------------------------------------------|------|----------------------------|------------------|-----|
|                      |                                                                         | M1   |                            | M2               |     |
| Homo sapiens         | LWELVLEQFEDLLVRILLAAALVSFVLWFEEGEET--TTAFVEPLVIMLILVANAIVGVWQE          |      |                            |                  | 108 |
| Oryctolagus cuniculu | LWELVIEQFEDLLVRILLAAACISFVLWFEEGEET--ITAFVEPFVILLILIANAIVGVWQE          |      |                            |                  | 108 |
| Makaira nigricans    | IWDLIVEQFEDLLVRILLAAACISFVLWFEEGEET--ITAFVEPFVILLILIANAIVGVWQE          |      |                            |                  | 108 |
| Pinctada fucata      | LWELILEQFDDLLVKILLAAIISFVLWFEESEEQ--VTAFVEPFVILTILICNAVGVWQE            |      |                            |                  | 108 |
| Plasmodio falciparum | IFELILNQFDLLVKIILLAAAFISFVLTLLDMKXKIEICDFIEPLVIVLILILNAAVGWQ            |      |                            |                  | 108 |
| Procamburus clarkii  | LLQLILEQFYDLLVKILLAAIISFVLACFEEGEET--VTAFVEPFVILLILIANAIVGVWQE          |      |                            |                  | 108 |
|                      | :*::** *****:***** :****: :: :                                          |      |                            | ***::** ** ***** |     |
|                      |                                                                         | M3   |                            | M4               |     |
| Homo sapiens         | TPLQRKLEFGRQLSHAISVICVAVVWINIGHFADPAHGGSWLRGAVYYFKIAVALAVAAIPEGLPAVITT  |      |                            |                  | 317 |
| Oryctolagus cuniculu | TPLQOKLDFGEQLSKVISLICVAVWLNIGHFNDPVHGGSWIRGAIYYFKIAVALAVAAIPEGLPAVITT   |      |                            |                  | 317 |
| Makaira nigricans    | TPLQAKLDFGEQLSKVISLICVAVWLNIGHFNDPVHGGSWIRGAVYYFKIAVALAVAAIPEGLPAVITT   |      |                            |                  | 317 |
| Pinctada fucata      | TPLQOKLDFGQQLSKVITVICVAVWLNIGHFNDPHGGSWIKGAIYYFKIAVALAVAAIPEGLPAVITT    |      |                            |                  | 317 |
| Plasmodio falciparum | TPLQIKIDLFGQQLSKIIFVICVTWVINFKHFSDDPIX-GSFLYGCLYYFKISVALAVAAIPEGLPAVITT |      |                            |                  | 317 |
| Procamburus clarkii  | TPLQOKLDFGEQLSKVISIICVAVWLNIGHFNDPHGGSWIKGAIYYFKIAVALAVAAIPEGLPAVITT    |      |                            |                  | 317 |
|                      | **** *:* ** *::** * :****:* ** * ** *::: *.:*****:*****                 |      |                            |                  |     |
|                      |                                                                         | M5   |                            | M6               |     |
| Homo sapiens         | YSNMKQFIRYLISSNVGEVVCIFLTAALGLPEALIPVQLLWVNLVTDGLPATALGF                |      |                            |                  | 782 |
| Oryctolagus cuniculu | YNNMKQFIRYLISSNVGEVVCIFLTAALGLPEALIPVQLLWVNLVTDGLPATALGF                |      |                            |                  | 782 |
| Makaira nigricans    | YNNMKQFIRYLISSNVGEVVCIFLTAALGLPEALIPVQLLWVNLVTDGLPATALGF                |      |                            |                  | 779 |
| Pinctada fucata      | YNNMKQFIRYLISSNIGEVCIFLTAALGIPEALIPVQLLWVNLVTDGLPATALGF                 |      |                            |                  | 782 |
| Plasmodio falciparum | YNNMKAFIRYLISSNIGEVCIFLTAALGIPDSLAPVQLLWVNLVTDGLPATALGF                 |      |                            |                  | 992 |
| Procamburus clarkii  | YNNMKQFIRYLISSNVGEVVSIFLTAALGLPEALIPVQLLWVNLVTDGLPATALGF                |      |                            |                  | 782 |
|                      | *.*** *****:***.*** ** *::** *****                                      |      |                            |                  |     |
|                      |                                                                         | M7   |                            | M8               |     |
| Homo sapiens         | LISGWLFRRYLAIGVYVGLATVAAATWVWF                                          | 857  | PMTMALSVLVTIEMCNALNSVSENQS | 920              |     |
| Oryctolagus cuniculu | LISGWLFRRYMAIGGYVGAATVGAAGWVWF                                          | 857  | PMTMALSVLVTIEMCNALNSLSENQS | 920              |     |
| Makaira nigricans    | LISGWLFRRYMAIGGYVGAATVGAAGWVWF                                          | 857  | PMTMALSVLVTIEMCNALNSLSENQS | 917              |     |
| Pinctada fucata      | LITGWLFRRYMAIGYVGCATVGAAGWVWF                                           | 857  | PMTMALSVLVTIEMCNALNSLSENQS | 920              |     |
| Plasmodio falciparum | LINGLTLRLRYIIIGTYVGIATVSIIFYVWF                                         | 1067 | PMTMALSVLVTIEMCNALNSLSENQS | 1143             |     |
| Procamburus clarkii  | LISGWLFRRYMAIGGYVGAATVFAASWVWF                                          | 857  | PMTMALSVLVTIEMCNALNSLSENQS | 920              |     |
|                      | **.* :***: * ** ** ** * :**:                                            |      | ***** ** ** *****:*****    |                  |     |
|                      |                                                                         | M9   |                            | M10              |     |
| Homo sapiens         | NPWLLVAVAMSMALHFLILLVPPPLIFQVTPLSGRQWVVVLQISLPVILLDEALKYL               | 987  |                            |                  |     |
| Oryctolagus cuniculu | NIWLLGSICLSMSLHFLILYVDPLPMIFKFKALDLTQWLMVLKISLPVIGLDEILKFI              | 987  |                            |                  |     |
| Makaira nigricans    | NLWLMAAMTLSMSLHFMIIYVDPLPMIFKFLTHLTFDQWLMVFKLSFPVILIDEVLKFF             | 984  |                            |                  |     |
| Pinctada fucata      | NKWLGAIALSMSLHFFILYVDVMSTIFQITPLNVAEWIAVLKISIPVILDETLKFI                | 987  |                            |                  |     |
| Plasmodio falciparum | NIWLLGSICLSMSLXFLILYVDPLPMIFKFKALDLTQWLMVLKISLPVIGLDEILKFI              | 1211 |                            |                  |     |
| Procamburus clarkii  | NFWLLAAMALSMTLHFIILYIDILSTVFPQVMPLSVAQWVAVLKISFPVLLDETLKFI              | 987  |                            |                  |     |
|                      | * ** : : : ** * *::: : . : *::: * : * : *::: ** : ** *:::               |      |                            |                  |     |

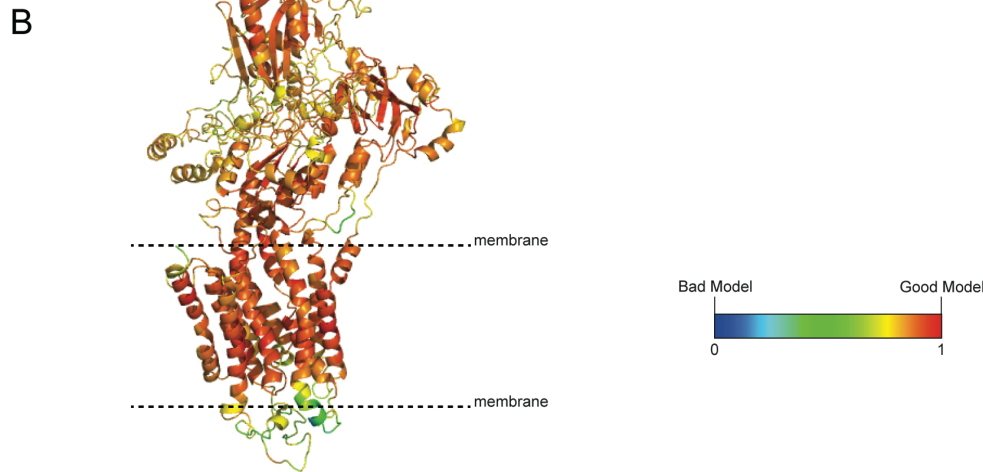

**Figure S1.** (A) Multi-sequence alignment of the transmembrane (TM) region comprising sequences coming from different species. The boxes at the top of the alignment indicate the TM helices. The rectangular box highlights the glutamic acid conserved in the sequences from all species but *P. falciparum* and indirectly involved in the binding of CPA. (B) Three-dimensional arrangement of the TM bundle of helices in the X-ray structure of rabbit SERCA (PDB: 3FGO). Ribbon representation of the PfATP6 model built using the X-ray structure of rabbit SERCA1a (PDB: 3FGO) as template. The structure is colored according to the color scale of QMEANBrane, the quality estimation method for membrane proteins used to evaluate the quality of the PfATP6 model.

|                      |     |                                                     |     |                      |      |                                                     |      |
|----------------------|-----|-----------------------------------------------------|-----|----------------------|------|-----------------------------------------------------|------|
| <i>P. falciparum</i> | 1   | MEEVIKNAHTYDVEDVLKFLDVKDNGLKNNEELDDRRLLKYLNELEVEKK  | 50  | <i>P. falciparum</i> | 598  | NDNSHITSLNENDKLNKNANHSNYTTAQATTNGYEAIGENTFEHGTFSFE  | 647  |
| Rabbit               | 1   | MEA---AHSKSTEECLAYFGVSETTGLTPDQVKRHLKHYGHNELPAEEG   | 46  | Rabbit               | 454  | -----                                               | 469  |
| <i>P. falciparum</i> | 51  | KSIFELILNQFDDLLVKILLAAAFISFVLTLDMKHKKIEICDFIEPLVI   | 100 | <i>P. falciparum</i> | 648  | NCFHSLGNKINTTSTHNNNNNNNSNSVSECISSWRNECKQIKIIEF      | 697  |
| Rabbit               | 47  | KSLWELVIEQFEDLLVRLILLAACISFVLAWFEEGEEETITA--FVEPFVI | 94  | Rabbit               | 470  | -----ERANACNSVIRQLMKKFTLEF                          | 491  |
| <i>P. falciparum</i> | 101 | VLILILNAAVGVWQECNAEKSLEALKELQPTKAKVLRDGKWEI--IDSKY  | 148 | <i>P. falciparum</i> | 698  | TRERKLMSVIVENKKEII----LYCKGAPENIKNCKYYLTKNDIRPL     | 742  |
| Rabbit               | 95  | LLILIANAVGVWQERNAENAEALKEYEPEMGKVYRDRKSVQRKARD      | 144 | Rabbit               | 492  | SRDRKMSVYCSPAKSSRAAVGNKMFVKGAPGEGVIDRCNYVRVGTTRVPM  | 541  |
| <i>P. falciparum</i> | 149 | LYVGDIIELSVGNKTPADARIIKIYSTSLKVEQSMLTGESCSVDKYAEM   | 198 | <i>P. falciparum</i> | 743  | NETLKNEIHNKIQNMG--KRALRTLSFAYKKLSSK--DLNIKNTDDYYKL  | 788  |
| Rabbit               | 145 | IVPGDIVEVAVGDKVPADIRILSIKSTTLRVDQISILTESVSVIKHTEPV  | 194 | Rabbit               | 542  | TGPFVKEILSVIKEWGTGRDTRLRCLALATRDTPPKREEMVLDDSSRFMEY | 591  |
| <i>P. falciparum</i> | 199 | EDSYKNCEIQLKKNLFSSTAIVCGRCIAVIVINIGMKEIGHIQHAVIES   | 248 | <i>P. falciparum</i> | 789  | EQDLIYLGGLGIIDPPRKYVGRAIRLCHMAGIRVFMITGDNINTARAIK   | 838  |
| Rabbit               | 195 | PD--PRAVNQDKKNMLFSGNTIAAGKALGIVATTGVSTEIGKIRDQM--A  | 240 | Rabbit               | 592  | ETDLTFVGVVGLDPPRKEVMSIQLCRDAGIRVIMITGDNKGTATAICR    | 641  |
| <i>P. falciparum</i> | 249 | NSEDTQTPLOKIDLFGQQLSKIIFVICVTVMIIINFKHFSDPIHG-SFLY  | 297 | <i>P. falciparum</i> | 839  | EINILNKNEGDDEKDNNTNKNKQICCYNGREFEDFSLEKQKHILKNTPR   | 888  |
| Rabbit               | 241 | ATEQDKTLPQQLDEFGEQLSKVISLICVAVWLVNIGHFNDPVHGGSWIR   | 290 | Rabbit               | 642  | RIGIFGENEEVADR-----AYTGREFDLPLAEQREACRRA--          | 677  |
| <i>P. falciparum</i> | 298 | GCLYFFKISVALAVAAIPEGLPAVITTCALGTRRMVKNKNAIVRKLQSV   | 347 | <i>P. falciparum</i> | 889  | IVFCRTEPKHKQIVKVLKDLGETVAMTGDGVNDAPALKSADIGIAMGIN   | 938  |
| Rabbit               | 291 | GAIYYFKIAVALAVAAIPEGLPAVITTCALGTRRMKNAIIVRSLPSVE    | 340 | Rabbit               | 678  | CCFARVEPSHKSIVEYLSQSYDEITAMTGDGVNDAPALKAETGIAMG-S   | 726  |
| <i>P. falciparum</i> | 348 | TLGCTTVICSDKTGTLTNTQMTTTFVHLFRESD---SLTEYQLCQKGD    | 397 | <i>P. falciparum</i> | 939  | GTEVAKEASDIVLADNFNTIVEAIKEGRCIYNNMKAFIRYLISNIGEV    | 988  |
| Rabbit               | 341 | TLGCTSVICSDKTGTLTNTQMSVCKMFIIDKVDGDFCSLNEFSI--TGST  | 380 | Rabbit               | 727  | GTAVAKTASEMVLADNFSTIVAAVEEGRAIYNNMKQFIRYLISNIVGEV   | 776  |
| <i>P. falciparum</i> | 398 | YFYESSNLTNDIYAGESSFFNKLKDEGNVEALTDGEEGSIDEADPYSD    | 447 | <i>P. falciparum</i> | 989  | ASIFITALLGIPDLSLAPVQLLWVNLVTDGLPATALGFNPPEHDMVKCKPR | 1038 |
| Rabbit               | 381 | Y-APEGEVLKNDKPI-RSQQFDGLVELAT-----                  | 395 | Rabbit               | 777  | VCIPLTAALGLPEALIPVQLLWVNLVTDGLPATALGFNPPLDMDRPPR    | 826  |
| <i>P. falciparum</i> | 448 | YFSSDSKMKNDLNNNNNNSSRSGAKRNIPLKEMKSNENTIIISRGSK     | 497 | <i>P. falciparum</i> | 1039 | HKNDNLINGLTLRLYIIIGTYVGIATVSIFVYWFLEYPDSMHTLINFYQ   | 1088 |
| Rabbit               | 396 | -----                                               | 415 | Rabbit               | 827  | SPKEPLISGWLFFRYMAIGGYVGAATVGAANWFMYAEDGPG--VTYHQ    | 873  |
| <i>P. falciparum</i> | 498 | ILEDKINKYCYSEYDYNFYMCVNCNEANIFCNDNSQIVKFGDSTELAL    | 547 | <i>P. falciparum</i> | 1089 | LSHYNQCKAWNNFRVKNVYDMSDHCYSYFSAGKIKASTLSLSVLVLIEMF  | 1138 |
| Rabbit               | 416 | -----ICAL-CNDSSLDFNETHGVYKVEGEATETAL                | 445 | Rabbit               | 874  | LTHFMQCTE-----DHPHFEGLD-CEIFEAP--EPMTMSLVLVTIEMC    | 914  |
| <i>P. falciparum</i> | 548 | LHFVNFDILPTFSKNNKMPAEYKNTTPVQSSNKKDKSPRGINKFFSSK    | 597 | <i>P. falciparum</i> | 1139 | NALNALSEYNSLFEIPPPWVNLVLTIGSLLLVHVLILYIPPLARIFGVV   | 1188 |
| Rabbit               | 446 | TTLVEKMMVNFTEVNRNLSKV-----                          | 453 | Rabbit               | 915  | NALNSLSENQSLMRPPWVNIWLLGSICLSMHLFLILYVDPLEPMIFKFK   | 964  |
|                      |     |                                                     |     | <i>P. falciparum</i> | 1189 | PLSAYDWFVFLWSPVVIILDEIKFYAKRKLKEEQRTKKIKID          | 1228 |
|                      |     |                                                     |     | Rabbit               | 965  | ALDLTQWLMVLKISLSPVIGLDELKFKFARNYLEDPEDERR--K        | 1001 |

**Figure S2.** Pairwise sequence alignment of the target (PfATP6) and template (rabbit SERCA1a) proteins.

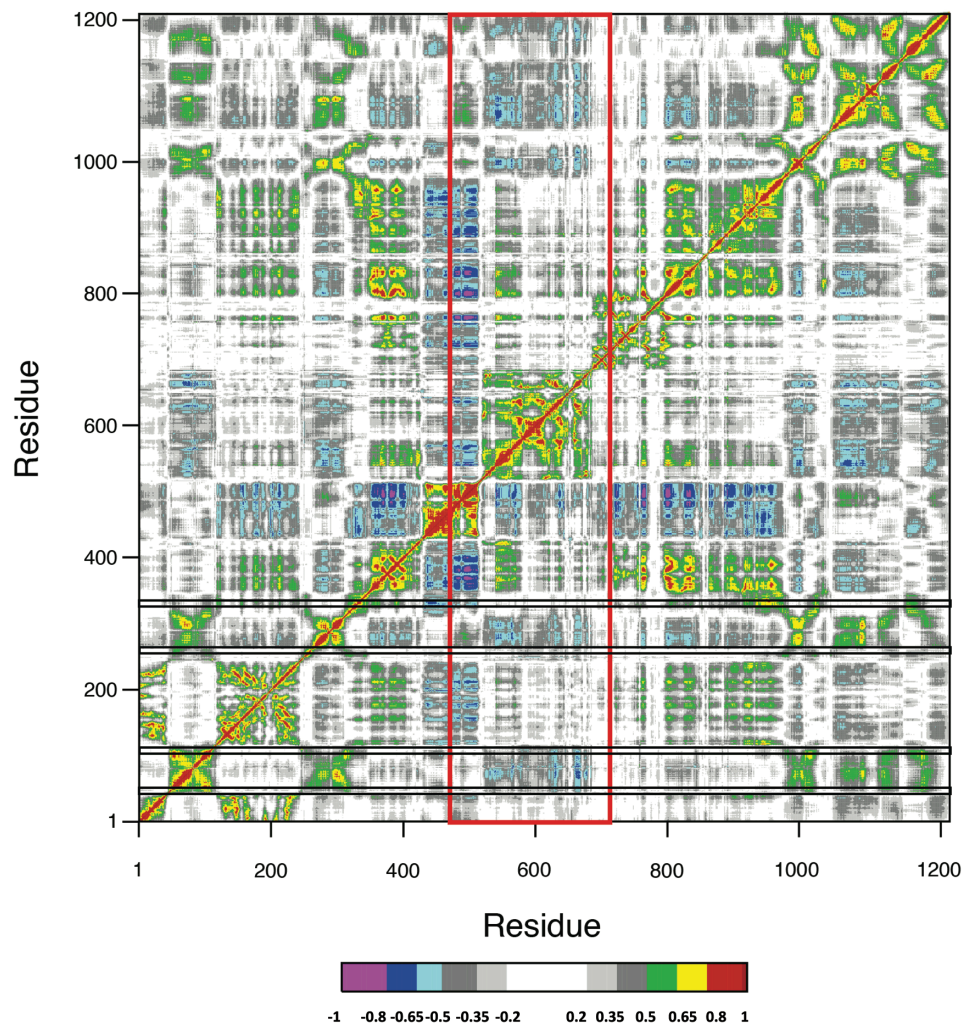

**Figure S3.** Cross correlation matrix calculated for the C $\alpha$  atoms of PfATP6. The residues of the CPA binding site are highlighted by black rectangles and the residues belonging to the LCR regions by a red rectangle. White-colored matrix cells indicate uncorrelated residues.

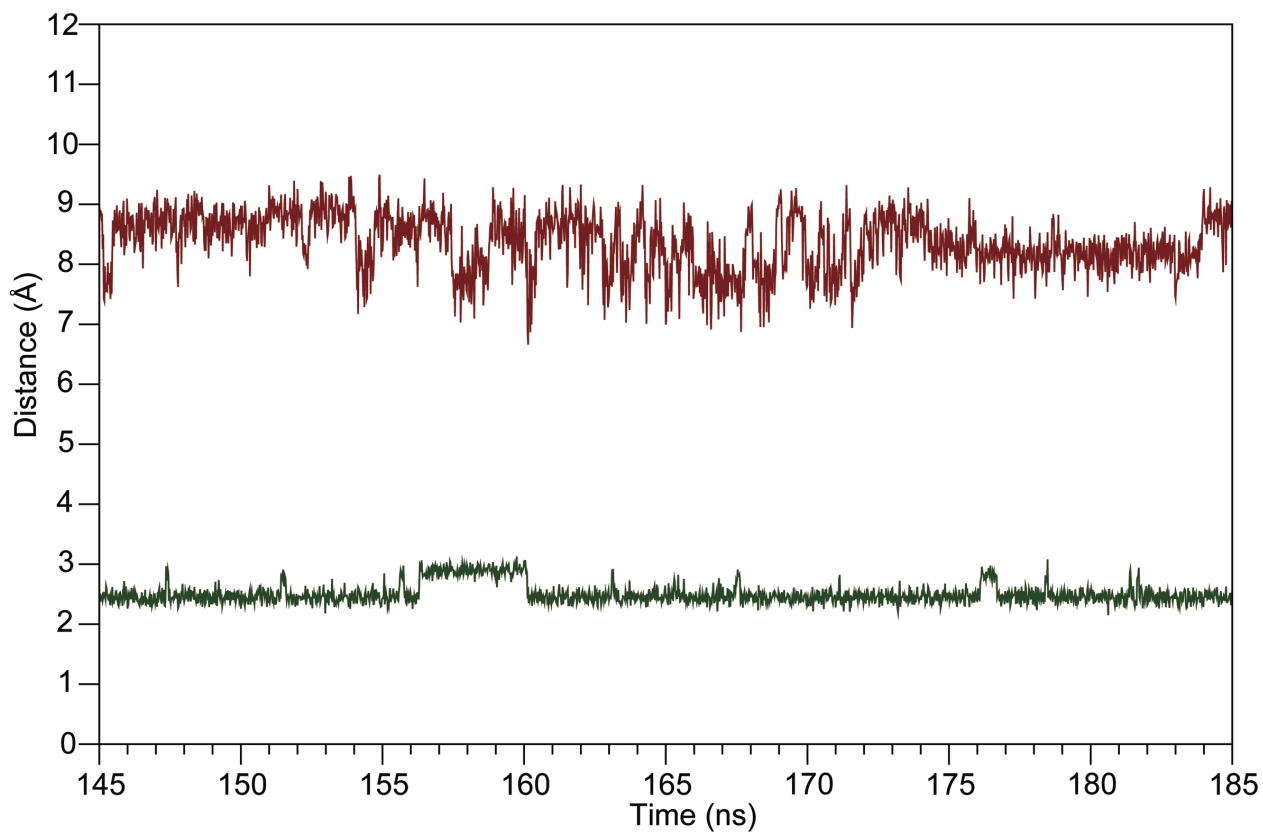

**Figure S4.** Evolution during the simulation time of the distance between the centers of masses of the carboxylic groups of  $_m\text{Glu255}$  and  $_m\text{Asp254}$  in SERCA1a (red line) and between the centers of masses of the carboxylic group of  $_p\text{Asp262}$  and the  $\delta 1$  and  $\delta 2$  carbons of  $_p\text{Leu263}$  of PfATP6 (green line).
